# Supplementary material
Source: MDPI journal article supplement (https://www.mdpi.com/2073-4441/13/4/543)
Supplement: s1 [file s1]

## Sheet: Table S1
Location	Tidal Range (m)	Method	Time Scale/Sampling Period	Pore water flux	Groundwater flux	References	Notes
				L m−2 d−1	L m−2 d−1
Belle Isle, MA, USA	2	Darcy's Law	seven days	3		Nuttle & Hemond, 1988
Nauset Marsh Estuary, MA, USA	1–1.5	Seepage meters	Tidal		24–72	Giblin & Gaines, 1990
		Average			48
Great Sippewissett Marsh, MA, USA	1	Freshwater exchange at inlet	Annual average		14 ± 2	Valiela et al. 1978	Marsh area = 0.9 km2, from Charette et al. (2003)
		Field measurements - piezometric head	~1 month (July)		6	Hemond & Fifield, 1982
		Darcy's law	Annual average		3	Lee, 1980
		Darcy's law	Annual range		1–26	Valiela et al. 1980
		Ra-226 balance (tidal creek)	July average		4 ± 10	Charette et al. 2003
		Chambers + water table monitoring	Annual average	18		Howes & Goehringer, 1994
		Average			8
Pamet River Estuary, MA, USA	>3	Ra-226 + Ra-228 balance (tidal creek)	Tidal; July 2001	46	62	Charette, 2007	Marsh area = 930,000 m2; SGD marsh = PEX; SGD brackish = GW
			Tidal; March 2002	57	126
			Tidal; July 2002	45	32
			Tidal; November 2002	43	73
			Tidal; March 2003	43	43
		Average		46.8	67.2
Sage Lot Pond, MA, USA	~0.5	Ra-226 + Ra-228 balance (tidal creek)	Tidal, April 2015	2	6	Tamborski et al. 2020
			Tidal; July 2015	15	0
			Tidal; October 2015	26	3
			Tidal; May 2016	4	3
			Tidal; July 2016	26	5
			Tidal; October 2016	47	9
			Tidal; May 2019	80	4
			Tidal; July 2019	156	2
			Tidal; November 2019	7	1
		Salt Balance	Annual average		36	Wang et al. 2016
		Average		40.3333	19.8333
Jamaica Bay, NY, USA	1.5	Ra-224 advective transport model (pore water)	Big Egg, avg 2013–2016	79 ± 32		Tamborski et al. 2017
			Elders East, avg 2015–2016	32 ± 13
			Elders West, avg 2015–2016	72 ± 25
			JoCo, avg 2015–2016	259 ± 178
			Yellow Bar, 2013	51 ± 13
		Ra isotope mass balance (basin-scale)	September 2004		140	Beck et al. 2007	bay area ~52 km2
			October 2004		83
			September 2005		102
			April 2006		31
			Average	98.6	89
St. Jones NERR, DE, USA	1.2	Seepage meters	Summer/Winter tidal	22		This study
Carter Creek, VA, USA	0.8	Darcy's Law	six tidal cycles	9.2	1	Harvey & Odum, 1990
Eagle Bottom, VA, USA	0.8	Darcy's Law	six tidal cycles	10.3	0.2	Harvey & Odum, 1990
South Hog Island, VA, USA	1.4	seepage meters; Darcy's Law	three days	120		Osgood, 2000
Ringfield Marsh, VA, USA		Salt balance; Darcy's Law; Br tracer	Monthly; Annually	11	7	Tobias et al. 2001	Salt balance average for 1997, Table 2
Elizabeth River Estuary, VA, USA	1	Ra-226 & Ra-228 balance	May 2000	12	11	Charette & Buesseler, 2004	SGD = fraction of Ra from Yorktown aquifer
North Inlet, SC, USA	1.4	Ra-224/Th-228 disequilibrium (sediments)	September		59 ± 9	Shi et al. 2019
			November		38 ± 9
			March		200 ± 46
			May		120 ± 20
			Auguest		78 ± 16
		Ra-224 balance (pore water)	5 tidal cycles	170–230		Bollinger & Moore, 1993
		Salt balance	multi-year		10	Morris, 1995
		Ra-226 & Ra-228 balance (tidal creek)	multi-year		20–40	Krest et al. 2000
			two tidal cycles		100	Rama & Moore, 1996
		Seepage meters	one tidal cycle		8–28	Whiting & Childers, 1989
		Sediment columns	na	3–290		Bradley & Morris, 1990
			Average	173.5	51.4
Folly Beach, SC, USA	1.5	Ra-224/Th-228 disequilibrium (sediments)	~2 weeks	54		Dias et al. 2016
Pritchards Island, SC, USA	2.5	seepage meters; Darcy's Law	four days	115		Osgood, 2000
Sapelo Island, GA, USA	2–3	Rn-222 balance	Weeks		51–58	Peterson et al. 2019
	2–3	Ra-226 & Ra-228 balance	2 year period		26 ± 11–142 ± 112	Shutte et al. 2020	average of 3 sites = 71 L m-2 d-1
			Average		62.75
Evans Head, Australia	1	Rn-222 balance	tidal + seasonal	55 ± 36–156 ± 81		Santos et al. 2019
			Average	105.5
Barwon Heads, Australia	1	Rn-222 balance	tidal		37+/− 24	Webb et al. 2018
Jiaozhou Bay, China	2.7	Darcy's Law	Weeks	0.03 ± 001		Qu et al. 2017
